# Supplementary material
Source: bioRxiv or medRxiv preprint supplement (https://www.biorxiv.org/highwire/filestream/62085/field_highwire_adjunct_files/0/203653-1.pdf)
Supplement: Supplementary file [file 203653-1.pdf]

Supplementary Table S1. Contractile and physical properties of soleus and EDL muscles from mdx mice treated with PBS or GlcNAc.

|                  | EDL          |                | Soleus       |                |
|------------------|--------------|----------------|--------------|----------------|
|                  | PBS          | GlcNAc         | PBS          | GlcNAc         |
| L0 (mm)          | 7.80 ± 0.18  | 8.00 ± 0.00    | 8.00 ± 0.00  | 8.17 ± 0.17    |
| TPT (ms)         | 27.60 ± 2.28 | 28.17 ± 1.28   | 39.40 ± 1.10 | 40.50 ± 3.97   |
| 1/2 RT (ms)      | 18.80 ± 2.30 | 21.67 ± 2.73   | 42.20 ± 0.93 | 42.67 ± 1.93   |
| Pt (g)           | 2.04 ± 0.18  | 2.11 ± 0.29    | 1.85 ± 0.05  | 2.13 ± 0.19    |
| P0 (g)           | 7.74 ± 0.62  | 11.63 ± 1.02** | 8.62 ± 0.43  | 12.02 ± 0.68** |
| Pt/P0            | 0.26 ± 0.02  | 0.18 ± 0.02**  | 0.22 ± 0.01  | 0.18 ± 0.02    |
| muscle mass (mg) | 6.44 ± 0.33  | 6.97 ± 0.25    | 6.22 ± 0.20  | 6.25 ± 0.37    |
| body weight (g)  | 19.80 ± 1.06 | 20.83 ± 0.98   |              |                |

Soleus and EDL muscles were incubated *ex vivo* and electrically stimulated to measure time to peak tension (TPT), half relaxation time (1/2RT), maximal twitch tension (Pt), and absolute force (P<sub>0</sub>). Data are presented as mean ± see, n=6. Significantly different from respective PBS-injected *mdx* muscle, \*\*p<0.01
